# Supplementary material for: Living in Food Deserts and Adverse Cardiovascular Outcomes in Patients With Cardiovascular Disease
Source: PubMed Central journal article supplement — J Am Heart Assoc. 2019 Feb 12;8(4):e010694. doi: 10.1161/JAHA.118.010694 (PMC6405658; doi:10.1161/jaha.118.010694), 2019-02-12
Supplement: JAH3-8-e010694-s001.pdf [file JAH3-8-e010694-s001.pdf]

# **SUPPLEMENTAL MATERIAL**

**Table S1. Subject characteristics stratified by neighborhood food access and by area income.**

|                                          | Adequate food access<br>N (%) | Poor food access<br>N (%) | P-value          | High Income Area<br>N (%) | Low Income Area<br>N (%) | P-value          |
|------------------------------------------|-------------------------------|---------------------------|------------------|---------------------------|--------------------------|------------------|
| Sample                                   | <b>2349 (48)</b>              | <b>2595 (52)</b>          |                  | <b>2755 (56)</b>          | <b>2189 (44)</b>         |                  |
| Age (year)                               | 64 ± 12                       | 63 ± 12                   | <b>0.046</b>     | 64 ± 12                   | 63 ± 12                  | <b>&lt;0.001</b> |
| Male                                     | 1493 (64)                     | 1655 (64)                 | 0.88             | 1819 (66)                 | 1329 (61)                | <b>&lt;0.001</b> |
| Black race                               | 437 (19)                      | 650 (25)                  | <b>&lt;0.001</b> | 452 (16)                  | 635 (29)                 | <b>&lt;0.001</b> |
| Education                                |                               |                           | <b>&lt;0.001</b> |                           |                          | <b>&lt;0.001</b> |
| High School graduate or less             | 1084 (46)                     | 1020 (39)                 |                  | 973 (35)                  | 1131 (52)                |                  |
| Some college                             | 479 (20)                      | 629 (24)                  |                  | 664 (24)                  | 444 (20)                 |                  |
| College graduate                         | 786 (33)                      | 946 (36)                  |                  | 1118 (41)                 | 614 (28)                 |                  |
| Urban                                    | 1010 (59)                     | 1836 (85)                 | <b>&lt;0.001</b> | 1736 (78)                 | 1110 (67)                | <b>&lt;0.001</b> |
| Hypertension                             | 1861 (79)                     | 2052 (79)                 | 0.83             | 2132 (78)                 | 1781 (81)                | <b>0.001</b>     |
| Diabetes                                 | 840 (36)                      | 908 (35)                  | 0.66             | 932 (34)                  | 816 (38)                 | <b>0.013</b>     |
| Hyperlipidemia                           | 1671 (71)                     | 1866 (72)                 | 0.55             | 1997 (73)                 | 1540 (71)                | 0.1              |
| Smoking                                  | 1652 (70)                     | 1741 (67)                 | <b>0.015</b>     | 1861 (68)                 | 1532 (70)                | 0.07             |
| History of coronary artery disease       | 2137 (91)                     | 2363 (91)                 | 0.47             | 2508 (91)                 | 1992 (91)                | 0.5              |
| History of myocardial infarction         | 595 (26)                      | 583 (23)                  | <b>0.021</b>     | 646 (24)                  | 532 (25)                 | 0.44             |
| History of revascularization             | 1270 (54)                     | 1367 (53)                 | 0.33             | 1491 (54)                 | 1146 (52)                | 0.22             |
| History of heart failure                 | 441 (19)                      | 515 (20)                  | 0.35             | 512 (19)                  | 444 (20)                 | 0.15             |
| BMI (mean kg/m <sup>2</sup> )            | 30 ± 6                        | 30 ± 7                    | 0.37             | 29 ± 6                    | 30 ± 7                   | <b>0.001</b>     |
| Total cholesterol (mg/dL)                | 166 ± 45                      | 165 ± 44                  | 0.37             | 165 ± 43                  | 167 ± 46                 | <b>0.048</b>     |
| LDL (mg/dL)                              | 95 ± 38                       | 94 ± 37                   | 0.45             | 93 ± 36                   | 96 ± 39                  | <b>0.019</b>     |
| HDL (mg/dL)                              | 42 ± 13                       | 43 ± 18                   | <b>0.003</b>     | 43 ± 13                   | 42 ± 18                  | 0.09             |
| eGFR (mL/min/1.73m <sup>2</sup> )        | 73 ± 24                       | 73 ± 25                   | 0.79             | 73 ± 23                   | 73 ± 26                  | 0.82             |
| Gensini angiographic score, median (IQR) | 6.5 (0-32)                    | 7 (0-32)                  | 0.65             | 6.5 (0-32)                | 6.5 (0-32)               | 0.41             |
| Ejection fraction %                      | 52 ± 13                       | 53 ± 13                   | <b>0.003</b>     | 53 ± 12                   | 52 ± 14                  | <b>0.011</b>     |
| Medications                              |                               |                           |                  |                           |                          |                  |

|                  |           |           |              |           |           |              |
|------------------|-----------|-----------|--------------|-----------|-----------|--------------|
| ACE/ARB use      | 1348 (57) | 1409 (54) | <b>0.029</b> | 1555 (56) | 1202 (55) | 0.29         |
| Aspirin use      | 1804 (77) | 1958 (75) | 0.27         | 2136 (78) | 1626 (74) | <b>0.008</b> |
| Clopidogrel use  | 1093 (47) | 1122 (43) | <b>0.02</b>  | 1225 (44) | 990 (45)  | 0.6          |
| Statin use       | 1637 (70) | 1834 (71) | 0.46         | 1983 (72) | 1488 (68) | <b>0.002</b> |
| Beta-blocker use | 1586 (68) | 1754 (68) | 0.98         | 1886 (68) | 1454 (66) | 0.13         |

BMI, body mass index. LDL, low-density lipoprotein cholesterol. HDL, high-density lipoprotein cholesterol. eGFR, estimated Glomerular filtration rate. ACE, angiotensin converting enzyme inhibitor. ARB, angiotensin II receptor blocker. Values shown are mean  $\pm$  SDs or median [interquartile range] for continuous variables and number (percentage) for categorical variables.

**Table S2. Subject characteristics stratified by both neighborhood food access and area income.**

|                                          | Low income<br>Poor access<br>(Food desert)<br>(N=981) | Low income<br>Adequate access<br>(N=1208) | High income<br>Poor access<br>(N=1614) | High income<br>Adequate access<br>(N=1141) | P-value          |
|------------------------------------------|-------------------------------------------------------|-------------------------------------------|----------------------------------------|--------------------------------------------|------------------|
| Age (year)                               | 63 ± 12                                               | 63 ± 12                                   | 64 ± 12                                | 65 ± 12                                    | <b>&lt;0.001</b> |
| Male                                     | 608 (62)                                              | 721 (60)                                  | 1047 (65)                              | 772 (68)                                   | <b>&lt;0.001</b> |
| Black race                               | 300 (31)                                              | 335 (28)                                  | 350 (22)                               | 102 (9)                                    | <b>&lt;0.001</b> |
| Education                                |                                                       |                                           |                                        |                                            | <b>&lt;0.001</b> |
| High School graduate or less             | 476 (49)                                              | 655 (54)                                  | 544 (34)                               | 429 (38)                                   |                  |
| Some college                             | 225 (23)                                              | 219 (18)                                  | 404 (25)                               | 260 (23)                                   |                  |
| College graduate                         | 280 (29)                                              | 334 (28)                                  | 666 (41)                               | 452 (40)                                   |                  |
| Urban                                    | 603 (77)                                              | 507 (59)                                  | 1233 (90)                              | 503 (60)                                   | <b>&lt;0.001</b> |
| Hypertension                             | 803 (82)                                              | 978 (81)                                  | 1249 (78)                              | 883 (78)                                   | <b>0.011</b>     |
| Diabetes                                 | 349 (36)                                              | 467 (39)                                  | 559 (35)                               | 373 (33)                                   | <b>0.023</b>     |
| Hyperlipidemia                           | 689 (71)                                              | 851 (71)                                  | 1177 (73)                              | 820 (72)                                   | 0.371            |
| Smoking                                  | 670 (68)                                              | 862 (71)                                  | 1071 (66)                              | 790 (69)                                   | <b>0.040</b>     |
| History of coronary artery disease       | 890 (91)                                              | 1102 (91)                                 | 1473 (91)                              | 1035 (91)                                  | 0.936            |
| History of myocardial infarction         | 221 (23)                                              | 311 (26)                                  | 362 (23)                               | 284 (26)                                   | 0.124            |
| History of revascularization             | 494 (50)                                              | 652 (54)                                  | 873 (54)                               | 618 (54)                                   | 0.224            |
| History of heart failure                 | 192 (20)                                              | 252 (21)                                  | 323 (20)                               | 189 (17)                                   | 0.051            |
| BMI (mean kg/m <sup>2</sup> )            | 30 ± 7                                                | 30 ± 7                                    | 30 ± 6                                 | 29 ± 6                                     | <b>0.003</b>     |
| Total cholesterol (mg/dL)                | 166 ± 47                                              | 168 ± 46                                  | 165 ± 43                               | 165 ± 44                                   | <b>0.207</b>     |
| LDL (mg/dL)                              | 96 ± 39                                               | 96 ± 39                                   | 93 ± 37                                | 94 ± 36                                    | <b>0.126</b>     |
| HDL (mg/dL)                              | 43 ± 23                                               | 42 ± 14                                   | 44 ± 14                                | 42 ± 13                                    | 0.009            |
| eGFR (mL/min/1.73m <sup>2</sup> )        | 72 ± 26                                               | 73 ± 25                                   | 73 ± 24                                | 71 ± 22                                    | 0.642            |
| Gensini angiographic score, median (IQR) | 7 (0 - 30)                                            | 6.5 (0 - 37)                              | 7 (0 - 33.5)                           | 6 (0 - 31)                                 | 0.549            |
| Ejection fraction %                      | 52 ± 13                                               | 52 ± 14                                   | 53 ± 13                                | 52 ± 12                                    | <b>0.011</b>     |
| Medications                              |                                                       |                                           |                                        |                                            |                  |

|                 |          |          |           |          |              |
|-----------------|----------|----------|-----------|----------|--------------|
| ACE/ARB use     | 522 (53) | 680 (56) | 887 (55)  | 668 (59) | 0.081        |
| Aspirin use     | 724 (74) | 902 (75) | 1234 (77) | 902 (79) | <b>0.020</b> |
| Clopidogrel use | 436 (44) | 554 (46) | 686 (43)  | 539 (47) | 0.079        |
| Statin use      | 666 (68) | 822 (68) | 1168 (72) | 815 (71) | <b>0.022</b> |

BMI, body mass index. LDL, low-density lipoprotein cholesterol. HDL, high-density lipoprotein cholesterol. eGFR, estimated Glomerular filtration rate. ACE, angiotensin converting enzyme inhibitor. ARB, angiotensin II receptor blocker. Values shown are mean  $\pm$  SDs or median [interquartile range] for continuous variables and number (percentage) for categorical variables.

**Table S3. Rate of adverse events according to area income and access to food.**

|             | <b>Low income<br/>Poor access<br/>(Food desert)<br/>(N=981)</b> | <b>Low income<br/>Adequate access<br/>(N=1208)</b> | <b>High income<br/>Poor access<br/>(N=1614)</b> | <b>High income<br/>Adequate access<br/>(N=1141)</b> | <b>P-value</b> |
|-------------|-----------------------------------------------------------------|----------------------------------------------------|-------------------------------------------------|-----------------------------------------------------|----------------|
| MI          | 59 (6)                                                          | 66 (6)                                             | 57 (4)                                          | 48 (4)                                              | 0.012          |
| Death       | 176 (18)                                                        | 212 (18)                                           | 235 (15)                                        | 189 (17)                                            | 0.076          |
| Death or MI | 207 (21)                                                        | 254 (21)                                           | 263 (16)                                        | 217 (19)                                            | 0.003          |

\*Number of events (%) are shown.
